# Supplementary material for: Cyclopentane rings in hydrophobic chains of a phospholipid enhance the bilayer stability to electric breakdown
Source: Royal Society of Chemistry journal article supplement (doi:10.1039/c9sm02001b), 2020-01-01
Supplement: c9sm02001b1.pdf [file c9sm02001b1.pdf]

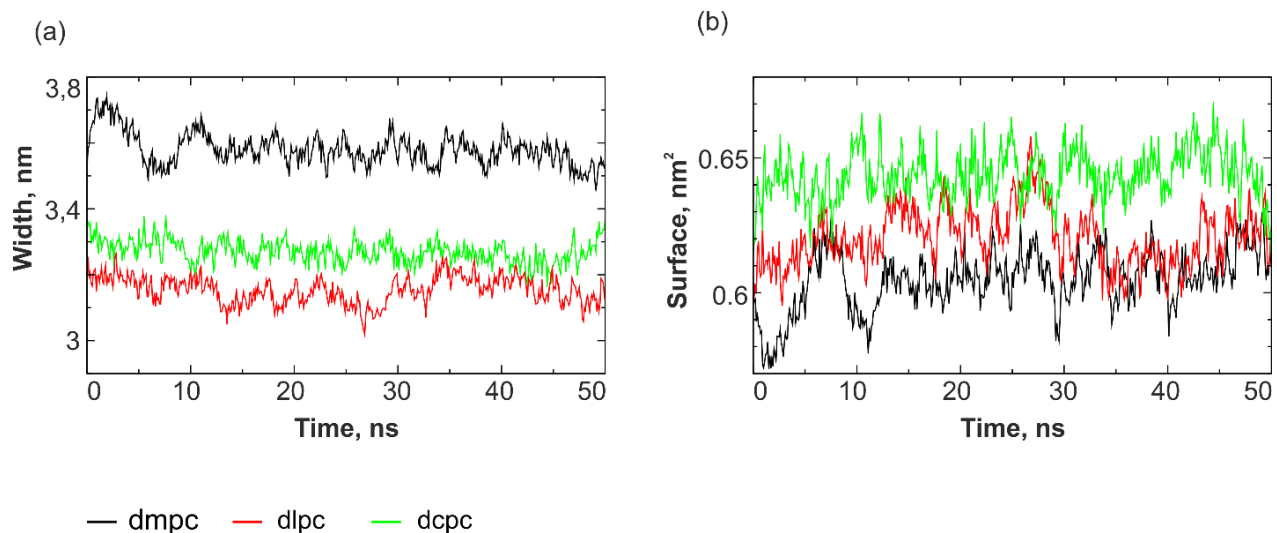

Figure S1 (a) Thickness and (b) area per lipid of bilayers formed by DLPC, diC12cp-PC, or DMPC in the course of MD simulations of systems containing 200 lipid molecules each with approximately 10000 water molecules added.
